# Supplementary material
Source: ML conference proceedings conference paper supplement (https://openreview.net/forum?id=QxJHh7Z39R)
Supplement: supplementary_material [file attachment]

## 1 URLs

**Github:** <https://github.com/ServiceNow/broad>

**Huggingface hub:** <https://huggingface.co/datasets/ServiceNow/PartialBROAD>

## 2 Metadata

```
license: cc-by-4.0
dataset_info:
  features:
    - name: date_captured
      dtype: string
    - name: coco_url
      dtype: string
    - name: license_name
      dtype: string
    - name: license_url
      dtype: string
    - name: coco_id
      dtype: string
    - name: image
      dtype: image
    - name: label
      dtype: int64
    - name: flickr_url
      dtype: string
  splits:
    - name: clean
      num_bytes: 333801279.747
      num_examples: 36157
    - name: cocomagenet
      num_bytes: 306403223
      num_examples: 2000
    - name: cocomagenet_mono
      num_bytes: 18956338
      num_examples: 2000
    - name: synthetic_gan
      num_bytes: 242598071.454
      num_examples: 24999
    - name: synthetic_diffusion
      num_bytes: 283705025
      num_examples: 25000
    - name: adversarial_autoattack_resnet
      num_bytes: 40058245
      num_examples: 5000
    - name: adversarial_autoattack_vit
      num_bytes: 35610460
      num_examples: 5000
    - name: adversarial_pgd_resnet
      num_bytes: 65806170
      num_examples: 5000
    - name: adversarial_pgd_vit
      num_bytes: 51803590
      num_examples: 5000
  download_size: 1432934722
```

```
dataset_size: 1378742402.201
pretty_name: BROAD
size_categories:
  - 10K<n<100K
tags:
  - imagenet
  - OOD detection
  - distribution shift
```

### 3 Author Statement

The authors bear all responsibility in case of violation of rights.

### 4 Hosting, licensing, and maintenance plan

The external splits are hosted on their original platforms and we provide on Github the id lists and code required to obtain their data. The internal splits are hosted via Huggingface and we will ensure it remains accessible.

### 5 Dataset documentation

We provide below a data card built with the data card framework (<https://sites.research.google/datacardsplaybook/>) recommended by the NeurIPS 2024 Datasets and Benchmarks Track Call for Papers.

|                                                                                                                                                                 |                                                                                                                                                                                                                                                                         |
|-----------------------------------------------------------------------------------------------------------------------------------------------------------------|-------------------------------------------------------------------------------------------------------------------------------------------------------------------------------------------------------------------------------------------------------------------------|
| <h1>Benchmarking Resilience Over Anomaly Diversity (BROAD)</h1>                                                                                                 | <p>This dataset is a collection of images from different distribution shifts, based on the ImageNet-2012 dataset. It is designed to evaluate the capability of out-of-distribution detection methods in detecting a broad variety of distribution shifts.</p>           |
| <p><b>DATASET LINK</b></p> <p><a href="https://huggingface.co/datasets/ServiceNow/PartialBROAD">https://huggingface.co/datasets/ServiceNow/PartialBROAD</a></p> | <p><b>DATA CARD AUTHOR(S)</b></p> <p><b>Charles Guille-Escuret: Lead author</b></p> <p><b>Pierre-André Noël: Contributor</b></p> <p><b>Ioannis Mitliagkas: Contributor</b></p> <p><b>David Vazquez: Contributor</b></p> <p><b>Joao Monteiro: Supervising author</b></p> |

| Authorship                 |                  |                                                                                                                                       |
|----------------------------|------------------|---------------------------------------------------------------------------------------------------------------------------------------|
| Publishers                 |                  |                                                                                                                                       |
| PUBLISHING ORGANIZATION(S) | INDUSTRY TYPE(S) | CONTACT DETAIL(S)                                                                                                                     |
| ServiceNow Research        | Corporate - Tech | <p><b>Publishing POC:</b> Joao Monteiro</p> <p><b>Affiliation:</b> ServiceNow</p> <p><b>Contact:</b> joao.monteiro@servicenow.com</p> |

| Dataset Overview                                                                                   |                                                                                             |                                                                                                                               |
|----------------------------------------------------------------------------------------------------|---------------------------------------------------------------------------------------------|-------------------------------------------------------------------------------------------------------------------------------|
| DATA SUBJECT(S)                                                                                    | DATASET SNAPSHOT                                                                            | CONTENT DESCRIPTION                                                                                                           |
| Data about places and objects<br><br>Synthetically generated data                                  | Size of Dataset                                                                             | 1906 MB                                                                                                                       |
|                                                                                                    | Number of Instances                                                                         | 139789                                                                                                                        |
|                                                                                                    | Labeled Classes                                                                             | 1000                                                                                                                          |
|                                                                                                    |                                                                                             | Each instance is a JPEG image. For splits with valid ImageNet classes, the instances are organized in folders, one per class. |
| Sensitivity of Data                                                                                |                                                                                             |                                                                                                                               |
| SENSITIVITY TYPE(S)                                                                                | FIELD(S) WITH SENSITIVE DATA                                                                | SECURITY AND PRIVACY HANDLING                                                                                                 |
| None                                                                                               | None                                                                                        | None                                                                                                                          |
| RISK TYPE(S)                                                                                       | SUPPLEMENTAL LINK(S)                                                                        | RISK(S) AND MITIGATION(S)                                                                                                     |
| No Known Risks                                                                                     |                                                                                             |                                                                                                                               |
| Dataset Version and Maintenance                                                                    |                                                                                             |                                                                                                                               |
| MAINTENANCE STATUS                                                                                 | VERSION DETAILS                                                                             | MAINTENANCE PLAN                                                                                                              |
| Limited Maintenance<br>(The data will not be updated, but any technical issues will be addressed.) | <b>Current Version:</b> 1.0<br><b>Last Updated:</b> 08/2023<br><b>Release Date:</b> 08/2023 | This dataset will be hosted on Huggingface.                                                                                   |
|                                                                                                    | NEXT PLANNED UPDATE(S)                                                                      | EXPECTED CHANGE(S)                                                                                                            |
|                                                                                                    | None                                                                                        | None                                                                                                                          |

| Motivations & Intentions |                                                                                                                                                      |                                                                                                                                                                                                                                                                                                                                                                    |
|--------------------------|------------------------------------------------------------------------------------------------------------------------------------------------------|--------------------------------------------------------------------------------------------------------------------------------------------------------------------------------------------------------------------------------------------------------------------------------------------------------------------------------------------------------------------|
| Motivations              |                                                                                                                                                      |                                                                                                                                                                                                                                                                                                                                                                    |
| PURPOSE(S)               | DOMAIN(S) OF APPLICATION                                                                                                                             | MOTIVATING FACTOR(S)                                                                                                                                                                                                                                                                                                                                               |
| Research                 | <i>Machine Learning, Computer Vision, OOD detection</i>                                                                                              | <i>OOD detection methods are typically only evaluated on unknown labels. This dataset aims to provide a more realistic evaluation for detecting unexpected image inputs.</i>                                                                                                                                                                                       |
| Intended Use             |                                                                                                                                                      |                                                                                                                                                                                                                                                                                                                                                                    |
| DATASET USE(S)           | SUITABLE USE CASE(S)                                                                                                                                 | UNSUITABLE USE CASE(S)                                                                                                                                                                                                                                                                                                                                             |
| Safe for research use    | <b>Measurement of the detection metrics (AUROC, FP@95 etc) of an OOD detection method.</b>                                                           |                                                                                                                                                                                                                                                                                                                                                                    |
|                          | RESEARCH AND PROBLEM SPACE(S)                                                                                                                        | CITATION GUIDELINES                                                                                                                                                                                                                                                                                                                                                |
|                          | It is unclear how well detection methods perform on distribution shifts other than unknown classes, that still may occur in real-world applications. | <b>BiBTeX:</b> <pre> ... @misc{guilleescuret2023expecting,   title={Expecting The Unexpected: Towards Broad Out-Of-Distribution Detection},   author={Charles Guille-Escuret and Pierre-André Noël and Ioannis Mitliagkas and David Vazquez and Joao Monteiro},   year={2023},   eprint={2308.11480},   archivePrefix={arXiv},   primaryClass={cs.LG} } ... </pre> |

## Access, Retention, & Wipeout

### Access

| ACCESS TYPE            | DOCUMENTATION LINK(S)                                                                                                                                                                                                  | PREREQUISITE(S)                                                                                                                                                                                                    |
|------------------------|------------------------------------------------------------------------------------------------------------------------------------------------------------------------------------------------------------------------|--------------------------------------------------------------------------------------------------------------------------------------------------------------------------------------------------------------------|
| External - Open Access | <a href="https://github.com/ServiceNow/broad">https://github.com/ServiceNow/broad</a><br><a href="https://huggingface.co/datasets/ServiceNow/PartialBROAD">https://huggingface.co/datasets/ServiceNow/PartialBROAD</a> | <i>Downloading images from external splits requires respecting the conditions of each of these splits. For instance, downloading clean ImageNet images requires getting approval from the ImageNet foundation.</i> |

### Retention

|  | DURATION       | POLICY SUMMARY |
|--|----------------|----------------|
|  | No limitation. |                |

## Provenance

### Collection

| METHOD(S) USED                                                   | METHODOLOGY DETAIL(S)                                                                                                                                                                                                                                                                                                                                                                                                                                                                                                                                                                                                                                                                                                                                                                                        | SOURCE DESCRIPTION(S)                                                                                                                                                                                                                                                                                                                                            |
|------------------------------------------------------------------|--------------------------------------------------------------------------------------------------------------------------------------------------------------------------------------------------------------------------------------------------------------------------------------------------------------------------------------------------------------------------------------------------------------------------------------------------------------------------------------------------------------------------------------------------------------------------------------------------------------------------------------------------------------------------------------------------------------------------------------------------------------------------------------------------------------|------------------------------------------------------------------------------------------------------------------------------------------------------------------------------------------------------------------------------------------------------------------------------------------------------------------------------------------------------------------|
| Artificially Generated<br><br>Taken from other existing datasets | <p><b>Artificially Generated:</b></p> <p><b>Source:</b> Generated by adversarial attacks from AutoAttack on pretrained ResNet50 and ViT-b/16, and by generation from conditional BigGan and stable diffusion. More details on <a href="https://huggingface.co/datasets/ServiceNow/PartialBROAD">https://huggingface.co/datasets/ServiceNow/PartialBROAD</a></p> <p><b>Platform:</b> N/A</p> <p><b>Is this source considered sensitive or high-risk?</b> No</p> <p><b>Primary modality of collected data:</b> Image Data</p> <p><b>Taken from other existing datasets:</b></p> <p><b>Source:</b> ImageNet-2012, iNaturalist, MS COCO, ImageNet-O, ImageNet-C, OpenImage-O</p> <p><b>Is this source considered sensitive or high-risk?</b> No</p> <p><b>Primary modality of collected data:</b> Image Data</p> | <p><b>Artificially Generated:</b></p> <ul style="list-style-type: none"><li>- Adversarial attacks</li><li>- Synthetic samples</li></ul> <p><b>Taken from other existing datasets:</b></p> <ul style="list-style-type: none"><li>- Subset of images from ImageNet-2012, iNaturalist, MS COCO, ImageNet-C, and full dataset from ImageNet-O, OpenImage-O</li></ul> |
| COLLECTION CADENCE                                               | DATA INTEGRATION                                                                                                                                                                                                                                                                                                                                                                                                                                                                                                                                                                                                                                                                                                                                                                                             | DATA PROCESSING                                                                                                                                                                                                                                                                                                                                                  |

|                                                                                                                                         |                                                                                                                                                                                                                                                                                                                                                                              |                                                                                                     |
|-----------------------------------------------------------------------------------------------------------------------------------------|------------------------------------------------------------------------------------------------------------------------------------------------------------------------------------------------------------------------------------------------------------------------------------------------------------------------------------------------------------------------------|-----------------------------------------------------------------------------------------------------|
| <b>Static</b><br>(Data was collected once from single or multiple sources.)                                                             |                                                                                                                                                                                                                                                                                                                                                                              | No specific processing                                                                              |
| <b>Collection Criteria</b>                                                                                                              |                                                                                                                                                                                                                                                                                                                                                                              |                                                                                                     |
| <b>DATA SELECTION</b>                                                                                                                   | <b>DATA INCLUSION</b>                                                                                                                                                                                                                                                                                                                                                        | <b>DATA EXCLUSION</b>                                                                               |
| Available datasets for corruptions, unknown labels and multiple labels<br><br>Generated data for adversarial attacks and synthetic data | Clean: random subset of ImageNet validation set<br>Adversarial attacks: all attacks for PGD, only the best attack model for AutoAttack<br>Synthetic: all data included<br>Unknown classes: all data included<br>CoComageNet: please refer to : <a href="https://huggingface.co/datasets/ServiceNow/PartialBROAD">https://huggingface.co/datasets/ServiceNow/PartialBROAD</a> | No Exclusions                                                                                       |
| <b>Relationship to Source</b>                                                                                                           |                                                                                                                                                                                                                                                                                                                                                                              |                                                                                                     |
| <b>USE &amp; UTILITY(IES)</b>                                                                                                           | <b>BENEFIT AND VALUE(S)</b>                                                                                                                                                                                                                                                                                                                                                  | <b>LIMITATION(S) AND TRADE-OFF(S)</b>                                                               |
| <b>Evaluation of detection scores</b>                                                                                                   | <b>Existing datasets:</b> agglomeration of images from different types of distribution shifts for broad evaluation<br><b>Synthetic data:</b> Standardization of benchmarking by providing a fixed set of synthetic data for reproducible evaluations, and representation of rarely evaluated distribution shift types.                                                       | <b>All splits are distribution shifts for ImageNet-2012. No other in-distribution is available.</b> |

|                             |                                                |                                                                                                                              |
|-----------------------------|------------------------------------------------|------------------------------------------------------------------------------------------------------------------------------|
| <b>Extended Use</b>         |                                                |                                                                                                                              |
| <b>Use with Other Data</b>  |                                                |                                                                                                                              |
| <b>SAFETY LEVEL</b>         | <b>KNOWN SAFE DATASET(S) OR DATA TYPE(S)</b>   | <b>BEST PRACTICES</b>                                                                                                        |
| Safe to use with other data | <b>Any dataset</b>                             | Add novel splits that can be interpreted as distribution shifts from ImageNet-2012. Keep distribution shift types separated. |
|                             | <b>KNOWN UNSAFE DATASET(S) OR DATA TYPE(S)</b> | <b>LIMITATION(S) AND RECOMMENDATION(S)</b>                                                                                   |

|  |                                         |                                                 |
|--|-----------------------------------------|-------------------------------------------------|
|  | No known unsafe datasets or data types. | The in-distribution is limited to ImageNet-2012 |
|--|-----------------------------------------|-------------------------------------------------|

## Forking & Sampling

| SAFETY LEVEL                                                                | ACCEPTABLE SAMPLING METHOD(S) | BEST PRACTICE(S)                                                            |
|-----------------------------------------------------------------------------|-------------------------------|-----------------------------------------------------------------------------|
| Should not be forked and/or sampled                                         |                               | Evaluate detection scores on all data for comparability and standardization |
|                                                                             | RISK(S) AND MITIGATION(S)     | LIMITATION(S) AND RECOMMENDATION(S)                                         |
| All data should be included in the evaluation to guarantee fair evaluations |                               |                                                                             |

## Use in ML or AI Systems

| DATASET USE(S) | NOTABLE FEATURE(S) | USAGE GUIDELINE(S)                                                                                                                             |
|----------------|--------------------|------------------------------------------------------------------------------------------------------------------------------------------------|
| Testing        |                    | Compare detection score to the in-distribution (clean) and that of each of the other splits. Measure detection metrics such as AUROC or FPR@95 |

## Known Applications & Benchmarks

| ML APPLICATION(S)                    | EVALUATION RESULT(S)                                                                    | EVALUATION PROCESS(ES)                                                                                                                          |
|--------------------------------------|-----------------------------------------------------------------------------------------|-------------------------------------------------------------------------------------------------------------------------------------------------|
| <i>Out-of-distribution Detection</i> | Please refer to <a href="https://arxiv.org/pdf/2308.11480">arxiv.org/pdf/2308.11480</a> | Detection score of each benchmarked detection method were computed on each split, and detection metric with respect to the clean split deduced. |

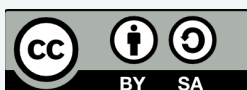

The [Data Cards Playbook ↗](#) by Google Research is licensed under a Creative Commons Attribution-ShareAlike 4.0 International License.

You are free to share and adapt this work under the [appropriate license terms ↗](#).
